# Supplementary material for: Thermal Degradation and Organic Chlorine Removal from Mixed Plastic Wastes
Source: MDPI journal article supplement (doi:10.3390/en15166058), 2022-08-21
Supplement: s1 [file s1]

Archive with 2 entries (2 files):
- Supplementary Material - Additional Figures & Tables.pdf
- Supplementary Material - Heat Transfer Model Development.pdf
