# Supplementary material for: Thermal Degradation and Organic Chlorine Removal from Mixed Plastic Wastes
Source: MDPI journal article supplement (doi:10.3390/en15166058), 2022-08-21
Supplement: s1 [file s1]

## Additional Figures and Tables

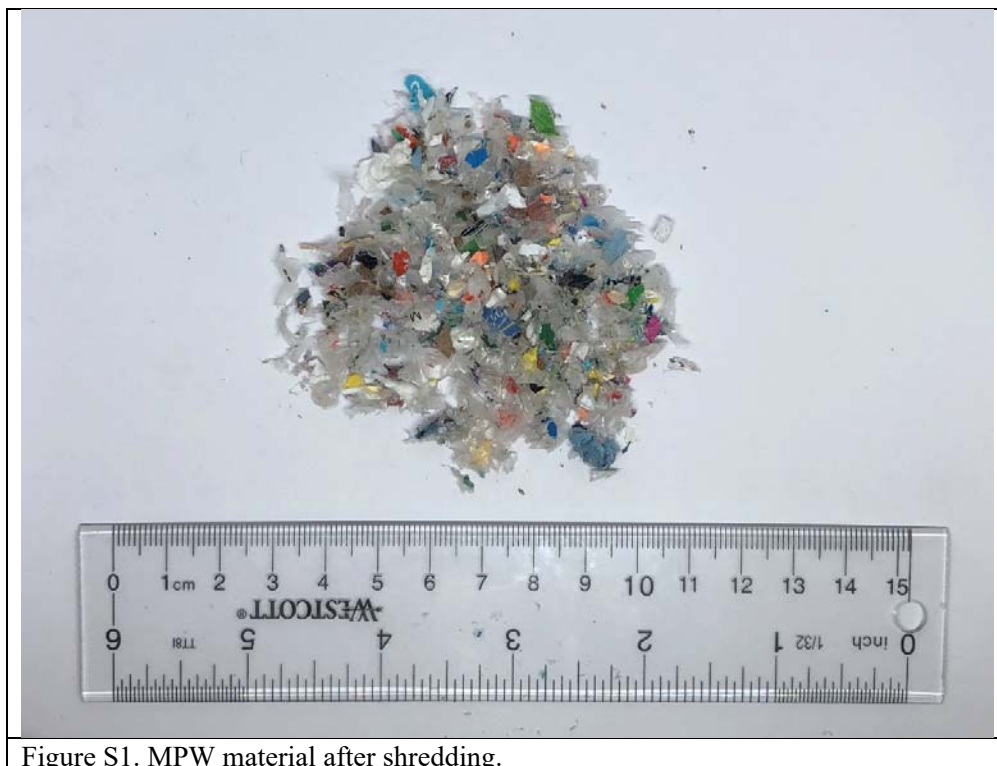

Figure S1. MPW material after shredding.

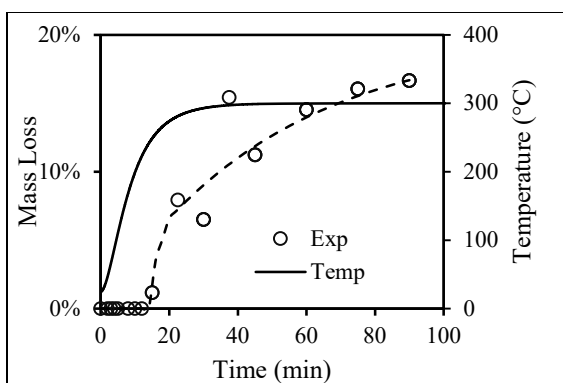

Figure S2. Temperature transient and mass loss of MPW vs. time @ 300°C.

| Table S1. C/H/N/O composition results in treated MPW |            |      |      |       |      |
|------------------------------------------------------|------------|------|------|-------|------|
| ML                                                   | Time (min) | %N   | %C   | %H    | %O   |
| 2.3%                                                 | 5.0        | 0.79 | 65.6 | 9.86  | 17.7 |
| 2.3%                                                 | 5.0        | 0.87 | 67.9 | 10.13 | 17.0 |
| 7.0%                                                 | 9.0        | 0.92 | 71.3 | 10.26 | 16.0 |
| 7.0%                                                 | 9.0        | 0.85 | 69.8 | 10.38 | 16.3 |

|       |       |      |      |       |      |
|-------|-------|------|------|-------|------|
| 8.2%  | 9.5   | 0.96 | 70.8 | 10.81 | 16.0 |
| 8.2%  | 9.5   | 0.87 | 70.2 | 10.59 | 15.3 |
| 9.7%  | 10.8  | 0.96 | 73.8 | 10.73 | 11.3 |
| 9.7%  | 10.8  | 0.89 | 73.1 | 10.82 | 12.8 |
| 16.5% | 11.0  | 0.89 | 74.5 | 10.29 | 11.2 |
| 16.5% | 11.0  | 0.98 | 74.4 | 10.19 | 11.6 |
| 19.2% | 12.5  | 0.89 | 76.6 | 10.42 | 8.7  |
| 19.2% | 12.5  | 0.87 | 75.8 | 10.44 | 8.1  |
| 22.7% | 15.0  | 0.85 | 76.7 | 10.40 | 8.0  |
| 22.7% | 15.0  | 0.89 | 76.9 | 10.40 | 7.8  |
| 27.9% | 18.8  | 0.89 | 79.4 | 11.30 | 5.7  |
| 27.9% | 18.8  | 0.85 | 80.8 | 11.63 | 5.5  |
| 30.4% | 30.0  | 0.90 | 81.1 | 11.34 | 3.9  |
| 30.4% | 30.0  | 0.84 | 82.0 | 11.62 | 3.9  |
| 31.4% | 50.0  | 0.89 | 80.9 | 11.30 | 4.4  |
| 31.4% | 50.0  | 0.84 | 80.6 | 11.06 | 3.9  |
| 34.7% | 38.5  | 0.84 | 81.9 | 11.27 | 4.5  |
| 34.7% | 38.5  | 0.82 | 81.8 | 11.73 | 4.1  |
| 35.4% | 60.0  | 0.91 | 81.0 | 10.88 | 3.7  |
| 35.4% | 60.0  | 0.91 | 81.9 | 11.12 | 3.6  |
| 38.0% | 75.0  | 0.97 | 81.8 | 11.44 | 3.6  |
| 38.0% | 75.0  | 0.91 | 81.6 | 11.50 | 3.5  |
| 43.2% | 90.0  | 0.83 | 81.9 | 11.47 | 3.5  |
| 43.2% | 90.0  | 0.90 | 81.6 | 11.32 | 3.5  |
| 44.6% | 180.0 | 0.99 | 82.2 | 11.31 | 3.3  |
| 44.6% | 180.0 | 0.99 | 82.2 | 11.29 | 3.2  |
| 59.0% | 240.0 | 1.20 | 80.9 | 9.34  | 4.1  |
| 59.0% | 240.0 | 1.15 | 81.0 | 9.69  | 4.0  |
| 66.9% | 330.0 | 1.23 | 80.1 | 8.61  | 4.8  |
| 66.9% | 330.0 | 1.18 | 79.3 | 8.39  | 4.9  |
| 70.9% | 420.0 | 1.64 | 82.6 | 7.73  | 5.6  |
| 70.9% | 420.0 | 1.35 | 77.0 | 7.53  | 5.7  |
| 74.7% | 450.0 | 1.55 | 76.5 | 7.03  | 6.5  |
| 74.7% | 450.0 | 1.56 | 77.6 | 6.73  | 6.4  |
| 83.0% | 922.8 | 2.00 | 64.9 | 2.82  | 15.7 |
| 83.0% | 922.8 | 2.07 | 63.2 | 2.39  | 14.3 |
| 90.7% |       | 2.18 | 52.6 | 1.75  | 14.1 |
| 90.7% |       | 2.71 | 53.0 | 1.67  | 13.4 |

---
