# Supplementary material for: Thermal Degradation and Organic Chlorine Removal from Mixed Plastic Wastes
Source: MDPI journal article supplement (doi:10.3390/en15166058), 2022-08-21
Supplement: s1 [file s1 › Supplementary Material - Heat Transfer Model Development.pdf]

### Heat Transfer Model Development

To obtain the sample temperature transient during the experiments, it is essential to determine the heat transfer regimes from the furnace to the reactor and the reactor to the sample. For this, the Biot number ( $Bi$ ) and Thermal Thiele Modulus ( $M$ ) were used. The former is defined by:

$$Bi = \frac{h}{\lambda_R / L_{c_w}} \quad (S1)$$

where  $h$  is the convective heat coefficient,  $\lambda_R$  is the thermal conductivity of the reactor, and  $L_{c_w}$  is the wall thickness. Since the area of the vent opening is  $\sim 0.7\%$  of the area of the reactor top surface, the effect of the vent was neglected. Table S1 summarizes the parameters used for the heat transfer modeling, indicating that the value of  $Bi$  is 0.0003, which is significantly smaller than 1, and means the reactor wall temperature is uniform. To calculate the temperature of the reactor wall, the heat rate equals to:

$$\frac{dQ(t)}{dt} = hA_W(T_F - T_w(t)) \quad (S2)$$

where  $A_W$  is the reactor surface area,  $T_F$  is the furnace set temperature, and  $T_w(t)$  is the reactor wall temperature. In addition, the total heat required to increase the reactor temperature,  $Q(t)$ , is given by:

$$Q(t) = mc_{p_w}(T_w(t) - T_{ow}) \quad (S3)$$

where  $m$ ,  $c_{p_w}$ ,  $T_w(t)$  and  $T_{ow}$  represents the mass, heat capacity of the reactor wall, reactor wall temperature, and initial temperature of the reactor wall, respectively. Introducing Equation (S2) into (S3) yields:

$$T^*(t) = 1 - \left(1 - \frac{T_{ow}}{T_F}\right) e^{-\frac{t}{\tau_R}} \quad (S4)$$

where  $T^*(t)$  is defined as  $T^*(t) = \frac{T_s(t)}{T_F}$ , with  $T_s(t)$  representing the temperature of the surface of

the sample, and  $\tau$  is the characteristic time of the reactor wall, defined as  $\tau_R = \frac{mc_{p_w}}{hA_w}$ .

For the heat transfer from the reactor walls to the sample, both convection and conduction take place. As the sample is touching the reactor wall, it is essential to know the thermal contact resistance  $R''$ , which is estimated to be  $2.6 \times 10^{-4} \text{ m}^2\text{-K/W}$  in this case (Bergman et al., 2011). In addition, the thermal resistance for convection from the reactor wall to the sample can be calculated through the following:

$$R_{conv} = \frac{1}{hA} \quad (S5)$$

In Table S1  $R_{conv}$  was calculated to be 9.69 K/W, which is significantly greater than the contact resistance with this specific area (0.0003 K/W). The contact resistance was neglected in this case.

| Table S1. Estimated values of the parameters used for the heat transfer modeling. |        |                            |
|-----------------------------------------------------------------------------------|--------|----------------------------|
| Parameter                                                                         | Value  | Source                     |
| $h$ , W/m <sup>2</sup> -K                                                         | 10     | (Bergman et al., 2011)     |
| $\lambda_R$ for reactor, W/m-K                                                    | 45     | (Peet et al., 2011)        |
| $\lambda_S$ for sample, W/m-K                                                     | 0.4    | (De Carvalho et al., 1996) |
| $\rho$ (apparent), kg/m <sup>3</sup>                                              | 508.5  | Measured in this study     |
| $c_{p_w}$ for reactor wall (apparent), J/kg-K                                     | 490    | (Bergman et al., 2011)     |
| $c_{p_s}$ for sample (apparent), J/kg-K                                           | 1400   | (Bergman et al., 2011)     |
| $L_{c_R}$ for reactor, m                                                          | 0.0013 | Measured in this study     |
| $L_{c_S}$ for sample, m                                                           | 0.003  | Measured in this study     |
| $A_R$ for reactor, m <sup>2</sup>                                                 | 0.05   | Measured in this study     |
| $A_S$ for sample, m <sup>2</sup>                                                  | 0.0103 | Measured in this study     |
| $R_{conv}$ for thermal resistance for convection, K/W                             | 9.69   | Current result             |
| $R''$ for thermal contact resistance, m <sup>2</sup> -K/W                         | 0.0003 | (Bergman et al., 2011)     |
| $R'$ for reaction rate, kg/m <sup>3</sup> -s                                      | 1.2    | Measured in this study     |
| $Bi$ for furnace to reactor                                                       | 0.0003 | Current result             |

|                     |       |                |
|---------------------|-------|----------------|
| $M$ for sample      | 0.05  | Current result |
| $\tau_s$ for sample | 484.2 | Current result |

Therefore,  $M$ , related to the reaction propagation within the sample, can be used to indicate whether the sample temperature is uniform during the reaction, given by:

$$M = \frac{R'}{\lambda_s / (c_{p_s} L_{c_s}^2)} \quad (S6)$$

With  $R'$  is the degradation reaction rate,  $\lambda_s$  is the thermal conductivity of the sample,  $c_{p_s}$  is the heat capacity of the sample and  $L_{c_s}$  is the characteristic length of the sample.

The value of  $M$  for in this study was calculated using the highest degradation rate, representing the worst-case scenario, and the value was found to be 0.05 (see Table S1). This number is significantly smaller than 1, indicating that the reaction rate of the particles was much slower than the reaction propagation within the sample. As a result, the sample particle temperature equilibrates faster than the reaction rate, and thus the sample temperature was assumed to be uniform during the thermal degradation reaction.

To calculate the temperature of the sample, the sample heat rate is given by:

$$\frac{dQ(t)}{dt} = \frac{T_w(t) - T_s(t)}{R_{tot}} \quad (S7)$$

For the heat transfer from the reactor wall to the sample, the total thermal resistance can be calculated by the following:

$$R_{tot} = \frac{1}{hA} + \frac{L}{k_s A} \quad (S8)$$

combining Equations (S7) and (S8), yields:

$$\frac{dQ(t)}{dt} = \frac{T_w(t) - T_s(t)}{\frac{1}{hA} + \frac{L}{\lambda_s A}} \quad (S9)$$

where,  $T_w(t)$  denotes the temperature of reactor wall,  $k_s$  denotes the thermal conductivity of the sample. And  $Q(t)$  is the heat required to heat the sample to a certain temperature, or

$$Q(t) = mc_{p_s}(T(t) - T_{o_s}) + mh_r \quad (S10)$$

where  $m$  is the sample mass,  $c_{p_s}$  is heat capacity of the sample,  $T(t) = T_s(t)$ ,  $T_{o_s}$  is the initial temperature of the sample and  $h_r$  is the enthalpy of reaction. Since MPW used in this study consists of various types of plastics, the enthalpy of reactions at a similar temperature range was estimated to be 0.0126-0.148 kJ/kg (Zhao et al., 2017). Since the value  $mh_r$  is significantly smaller than  $mc_p(T(t) - T_o)$  (estimated to be 525 kJ/kg for the 400°C experiments), this term was neglected in this study. Combining Equations (S9) and (S10), yields:

$$T^*(t) = 1 - \left(1 - \frac{T_{o_s}}{T_w}\right) e^{-\frac{t}{\tau_s}} \quad (S11)$$

where  $T^*(t)$  is defined as  $T^*(t) = \frac{T(t)}{T_w}$ , and  $\tau_s$  is the characteristic time of the sample, defined as

$$\tau_s = \frac{k_s mc_{p_s}}{hA(\lambda_s + hl)}.$$

## References

- Bergman, T.L., Incropera, F.P., DeWitt, D.P., Lavine, A.S., 2011. Fundamentals of heat and mass transfer. Wiley, pp. 983-1011, New York, p. 56.
- De Carvalho, G., Frollini, E., Dos Santos, W.N., 1996. Thermal conductivity of polymers by hot-wire method. J. Appl. Polym. Sci. 62, 2281–2285. [https://doi.org/10.1002/\(sici\)1097-4628\(19961226\)62:13<2281::aid-app12>3.3.co;2-t](https://doi.org/10.1002/(sici)1097-4628(19961226)62:13<2281::aid-app12>3.3.co;2-t)

Peet, M.J., Hasan, H.S., Bhadeshia, H.K.D.H., 2011. Prediction of thermal conductivity of steel.

Int. J. Heat Mass Transf. 54, 2602–2608.

<https://doi.org/10.1016/J.IJHEATMASSTRANSFER.2011.01.025>

Zhao, W., Liu, D., Zhang, Y., 2017. Study on the Influence of Pressure-Assisted Thermal

Processing on PET/PE via the Change of Melting Enthalpy. J. Food Process. Preserv. 41,

e13135. <https://doi.org/10.1111/JFPP.13135>
